# Supplementary material for: Prognostic value of new-onset right bundle-branch block in acute myocardial infarction patients: a systematic review and meta-analysis
Source: PeerJ. 2018 Mar 12;6:e4497. doi: 10.7717/peerj.4497 (PMC5853603; doi:10.7717/peerj.4497)
Supplement: Supplemental Information 4 [file peerj-06-4497-s004.xlsx]

## Sheet: Sheet1
First Author	Year	N-RBBB	P-RBBB(Con.)	1-yearl Mortality		Con.		In-hospital/30-day mortality		Con.		ventricular fibrillation		Con.		ventricular Arrhythmia		Con.		Chronic arrhythmias ( sinus or atrioventricular block≥2 degree)		Con.		Asystole		Con.		Heart failure		Con.		Cardiogenic shock		Con.		Post-MI angina		Con.		Reinfarction		Con.		Mechanical complications		Con.
Gann, D	1975	35	40					28	7	25	15	4	31	2	38	4	31	2	38					2	33	5	35	15	20	25	15	21	14	10	30
Melgarejo-Moreno A	1997	51	45	30	21	16	29	22	29	7	38	9	42	1	44	15	36	2	43	14	37	1	44					5	46	13	32	18	33	4	41	9	42	8	37	2	49	0	45	0	51	0	45
Vivas D	2010	92	27					20	72	0	27					42	50	2	25	22	70	8	19	7	85	0	27									8	84	0	27	9	83	2	25	1	91	0	27
Melgarejo-Moreno A	2015	212	253	86	126	62	191	67	145			39	173			39	173											50	162	88	165													10	202
Iwasaki, J	2009	99	20					25	74	2	18																	14	85	2	18	8	91	0	20									2	97	0	20
