# Supplementary material for: Prognostic value of new-onset right bundle-branch block in acute myocardial infarction patients: a systematic review and meta-analysis
Source: PeerJ. 2018 Mar 12;6:e4497. doi: 10.7717/peerj.4497 (PMC5853603; doi:10.7717/peerj.4497)
Supplement: Supplemental Information 5 [file peerj-06-4497-s005.xlsx]

## Sheet: short-time mortality
First Author	Year	Transient	Con.	Permanent	Con.
Melgarejo-Moreno，A	1997	2	23	20	6
Vivas,D	2010	1	46	19	23
Melgarejo-Moreno，A	2015	20	117	47	28
Iwasaki, J	2009	8	50	17	24
