# Supplementary material for: Prognostic value of new-onset right bundle-branch block in acute myocardial infarction patients: a systematic review and meta-analysis
Source: PeerJ. 2018 Mar 12;6:e4497. doi: 10.7717/peerj.4497 (PMC5853603; doi:10.7717/peerj.4497)
Supplement: Supplemental Information 6 [file peerj-06-4497-s006.xlsx]

## Sheet: Sheet1
First Author	Year	Transient	Con.	PRBBB	Con.
Melgarejo-Moreno A	1997	2	23	7	38
Vivas D	2010	1	46	0	27
Melgarejo-Moreno A	2015	20	117
Iwasaki, J	2009	8	50	2	18
